# Supplementary material
Source: Elsevier journal article supplement (https://www.sciencedirect.com/science/article/pii/S2173573515000952)
Supplement: mmc1 [file S2173573515000952:mmc1.docx]

**Situación y Recursos de la Otoneurología**

**Encuesta**

1. Su hospital cuenta con:

1. ¿Es un hospital universitario?

1. ¿Su hospital cuenta con una Unidad o Sección de otoneurología, o con personal que se encargue específicamente de la patología otoneurológica?

1. ¿Esta o Sección es reconocida formalmente dentro del organigrama del hospital?

1. Si no cuenta con una Unidad de Otoneurología, y considerando las características de su hospital, considera que una Unidad de Otoneurología es:

1. ¿Cuántos especialistas del servicio se dedican en mayor o menor medida a la otoneurología?

1. ¿Qué actividades se desarrollan en relación con la otoneurología? (puede seleccionar varias)

Especifique

Haga clic aquí para escribir texto.

1. ¿Con cuales de los siguientes medios cuenta su Servicio?

Especifique

Haga clic aquí para escribir texto.

1. ¿Realiza en su Servicio rehabilitación Vestibular Instrumental?

1. En caso afirmativo, ¿con que recursos humanos, además del otorrinolaringólogo, cuenta?

Especifique

Haga clic aquí para escribir texto.

1. Con cuánto tiempo cuenta, en la consulta, para atender a un paciente otoneurológico (primera consulta)?

1. ¿Qué recursos técnicos utiliza para la rehabilitación vestibular en el hospital?

Especifique

Haga clic aquí para escribir texto.

1. Además del personal médico ¿Con qué otros recursos humanos cuenta, que estén especialmente dedicados a trabajar en otoneurología?

Especifique

Haga clic aquí para escribir texto.

1. ¿Cuenta su Servicio con programa de formación M.I.R. en O.R.L.

1. En caso afirmativo ¿cuánto tiempo rotan los M.I.R. de O.R.L. por la unidad de otoneurología, si esta se considera unidad independiente, durante su período de residencia?

1. ¿Rotan residentes de otros Servicios (Medicina de Familia. Neurología etc.) por la unidad de otoneurología?

1. En caso de que la otoneurología no esté considerada una unidad específica y esté incluida en la sección de otología –otoneurología, ¿cuánto tiempo rotan los M.I.R. de O.R.L. por esa sección?

1. En los 3 últimos años ¿Cuántas comunicaciones relacionadas con la otoneurología se han presentado en congresos nacionales?

1. En los 3 últimos años ¿Cuántas comunicaciones relacionadas con la otoneurología se han presentado en congresos internacionales?

1. En los 3 últimos años ¿Cuántas publicaciones relacionadas con la otoneurología se han publicado en revistas nacionales?

1. En los 3 últimos años ¿Cuántas publicaciones relacionadas con la otoneurología se han publicado en revistas internacionales?

1. ¿Cuántas tesis doctorales relacionadas con la otoneurología se han presentado en los últimos 3 años?

1. Existen en su Servicio líneas de investigación sustentadas por organismos públicos o privados relacionadas con la otoneurología?

En caso de respuesta afirmativa, especifique

Haga clic aquí para escribir texto.

**Muchas gracias por su valiosa colaboración**
